# Supplementary material
Source: PubMed Central journal article supplement (PMC3510445)
Supplement: Supp_Data.pdf [file Supp_Data.pdf]

## Supplementary Data

SUPPLEMENTARY TABLE S1. PCR PRIMERS USED IN THE PRESENT STUDY

| <i>Gene</i>            | <i>Primer</i>                                                    | <i>Cycles/temp</i> | <i>Size (bp)</i> | <i>Accession no.</i>          |
|------------------------|------------------------------------------------------------------|--------------------|------------------|-------------------------------|
| <i>OCT-4</i>           | F 5'- GATATACCCAGGCCGATGTG-3'<br>R 5'- TCGATACTCGTCCGCTTTCT -3'  | 33/58              | 232              | EU926737                      |
| <i>NANOG</i>           | F 5'-GGGAAGGGTAATGAGTCCAA-3'<br>R 5'-AGCCTCCCTATCCCAGAAAA-3'     | 35/57              | 211              | DQ487022                      |
| <i>REX-1</i>           | F 5'-CAGCTGCCATAGGCTCTACC-3'<br>R 5'-GTCTGGCCTGACAAAGGTGT-3'     | 35/55              | 239              | XM_001255545                  |
| <i>FOXD-3</i>          | F 5'-CTATTTCGTACATCGCGCTCA-3'<br>R 5'-GGGTCCAGGGTCCAGTAGTT-3'    | 35/58              | 228              | ENSBTAG00000008501            |
| <i>NUCLEO STEMIN</i>   | F 5'-AGAATCGGATGAGCTGTTGG-3'<br>R 5'-ATCAGCATTGCCAGAGAGGT-3'     | 35/60              | 400              | NM_001034307.1                |
| <i>STAT-3</i>          | F 5'-GCCAAGAATCAAGCAGTTCC-3'<br>R 5'-CCAGGGCAGTAAGCATCTGT-3'     | 35/60              | 383              | DQ487026                      |
| <i>SOX-2</i>           | F 5'-TCCACATTCGAGATCAGCAA-3'<br>R 5'-CATGAGCGTCTTGTTTCC-3'       | 35/50              | 162              | DQ487021                      |
| <i>TELOME RASE</i>     | F 5'-GACTTCCAGCCGTACCTGAG-3'<br>R 5'- GATCCCCTGACACTGGATGT-3'    | 35/58              | 192              | NM_001046242.1                |
| <i>c-MYC</i>           | F 5'-GGAAGAAATTCGAGCTGCTG-3'<br>R- 5'- CGCCTCTTGTCATTCTCCTC-3'   | 35/60              | 922              | Q2HJ27                        |
| <i>HNF-4</i>           | F 5'-ACATCCCAGCCTTCTGTGAG-3'<br>R 5'-TCGTCAATCTGCAGCTCTTG-3'     | 35/58              | 238              | AF250028                      |
| <i>GATA-4</i>          | F 5'-CGGAAAGAGGGGATCAAAC-3'<br>R 5'-ATCTCCTCACTGCTGCTGGT-3'      | 35/58              | 152              | DQ487031                      |
| <i>AFP</i>             | F 5'-TCTTCCCCATGTTCTTCAGG-3'<br>R 5'-TTTACGGCAAATTTCTTCC-3'      | 35/55              | 205              | NM_001034                     |
| <i>ASA</i>             | F 5'-GGCATCATCACTCACTGGGA-3'<br>R 5'-TTGCCGATGGTGATGACCTG-3'     | 35/55              | 536              | Sritanaudomchai et al. (2007) |
| <i>BMP-4</i>           | F 5'-TGATACCTGAGACGGGAAG3'<br>R 5'-CTGGGATGTTCTCCAGATGTT-3'      | 35/57              | 318              | NM_001045877                  |
| <i>NF-68</i>           | F 5'-AGGAAGATGCTGAGGAAGCA-3'<br>R 5'-GTTGACCTGATTTCCGGGAGA-3'    | 35/55              | 183              | NM 174121                     |
| <i>MSX-1</i>           | F 5'- GGACTCCTCAAACCTGCCAGA-3'<br>R 5'- TACTGCTTCTGGCGGAACCTT-3' | 35/58              | 224              | NM_174798                     |
| <i>CYTOKAR RETIN18</i> | F 5'-CAGAGTCAAGTATGAGACAGAG<br>R-3'-TGTAGACCCCTTACTTCCTCC        | 35/53              | 182              | NM-001192095                  |
| <i>GAPDH</i>           | F ATCACCCCTGCTTCTACTGG<br>R AGGAGACAACCTGGTCCTCA                 | 35/60              | 235              | GU324291.1                    |

F, forward; R, reverse.
